# Supplementary material for: Long-Term High-Fat Diet Consumption Induces Cognitive Decline Accompanied by Tau Hyper-Phosphorylation and Microglial Activation in Aging
Source: MDPI journal article supplement (doi:10.3390/nu15010250), 2023-01-03
Supplement: s1 [file s1]

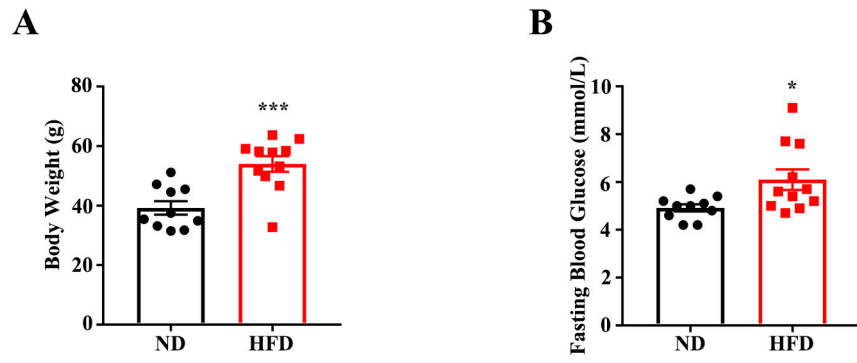

**Figure S1.** Long-term HFD feeding increases body weight and fasting blood glucose of aged mice. Body weight (A) and fasting blood glucose (B) of mice after 10-month ND or HFD feeding. Data are presented as Mean  $\pm$  SEM, (n=10-11) for each group. \*  $p < 0.05$ ; \*\*\* $p < 0.001$  vs. ND group.

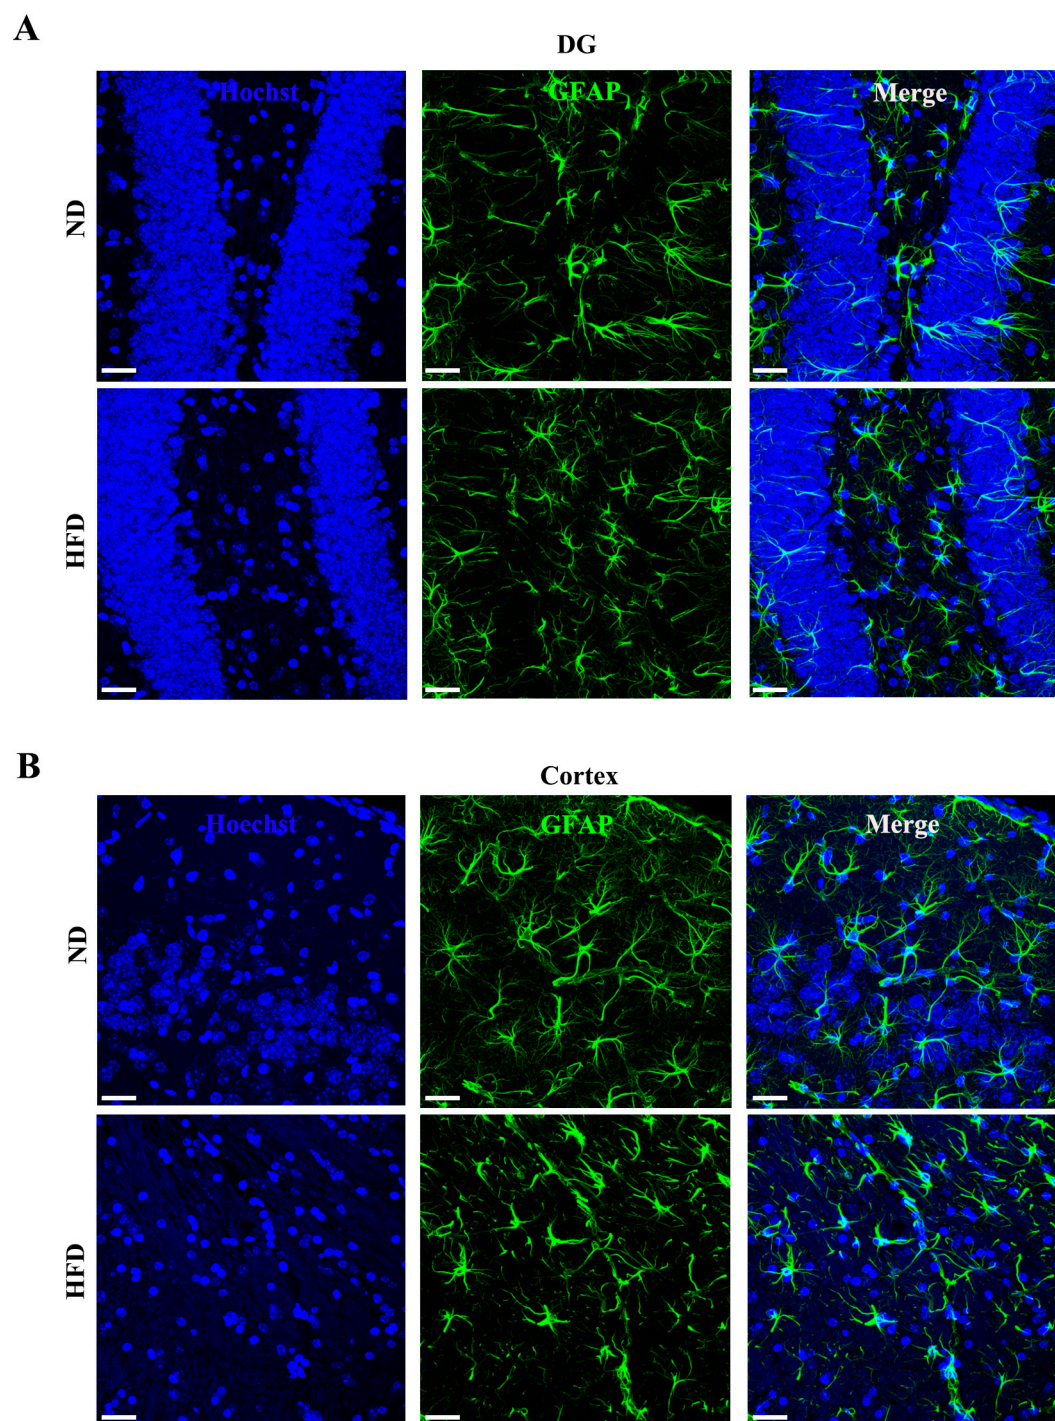

**Figure S2.** Long-term HFD feeding does not activated astrogliosis in aged mice. (A and B) The representative images of astrocyte in DG and Cortex area. (scale bar = 30  $\mu$ m).
